# Supplementary material for: Alzheimer's disease CSF biomarkers correlate with early pathology and alterations in neuronal and glial gene expression
Source: PubMed Central journal article supplement — Alzheimers Dement. 2024 Aug 27;20(10):7090–103. doi: 10.1002/alz.14194 (PMC11485399; doi:10.1002/alz.14194), 2024-08-27
Supplement: ALZ-20-7090-s003.pdf [file ALZ-20-7090-s003.pdf]

## Supplementary Figure 1

The biopsies in our cohort have minimal tau pathology on immunohistochemistry

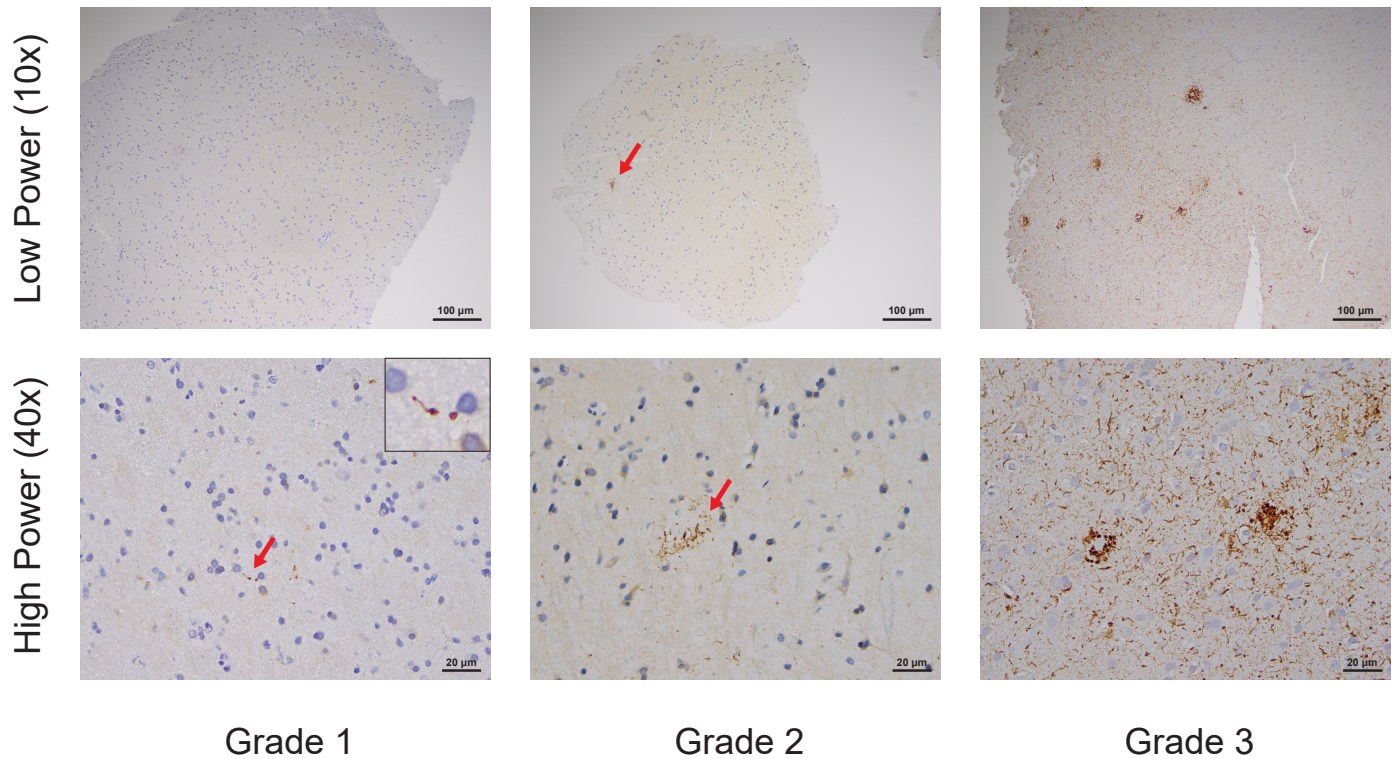

**Supplementary Figure 1** (reproduced from [10]) - We devised a rating scale to grade the minimal degree of tau pathology seen in NPH biopsies. All panels display tau immunohistochemistry of NPH biopsies at low-power (10x magnification, upper row) or high-power (40x magnification, lower row). Grade 0 was given to biopsies with no tau pathology. Grade 1 (left panels) was given to biopsies that have any tau pathology at all, usually one or more dystrophic neurites, but do not make criteria for Grade 2 (middle panels). Grade 2 was given to biopsies that have at least one tau-positive neuron or neuritic plaque, but do not make criteria for Grade 3 (right panels). Grade 3 was reserved for biopsies with tau pathology evenly distributed throughout the biopsy. It is difficult to appreciate tau pathology at low-power in grade 1 slides (upper left panel), and high-power is required to see single dystrophic neurites (lower left panel - red arrow, see blow-up insert). In grade 2 slides, one can usually see neuritic plaques at low-power (middle upper panel, red arrow), as well as at high-power (middle lower panel, red arrow). Grade 3 slides have obvious tau pathology at all magnifications.
